# Supplementary material
Source: HighWire-hosted journal article supplement (https://erj.ersjournals.com/content/58/3/2004172)
Supplement: inline-supplementary-material-1 [file inline-supplementary-material-1.pdf]

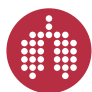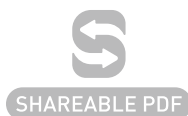

# The pathophysiological role of novel pulmonary arterial hypertension gene *SOX17*

Yukye Wu<sup>1</sup>, John Wharton<sup>1</sup>, Rachel Walters<sup>1</sup>, Eleni Vasilaki<sup>1</sup>, Jurjan Aman<sup>1,2</sup>, Lan Zhao <sup>1</sup>, Martin R. Wilkins <sup>1</sup> and Christopher J. Rhodes<sup>1</sup>

<sup>1</sup>National Heart and Lung Institute, Imperial College London, London, UK. <sup>2</sup>VUmc, Amsterdam University Medical Center, Amsterdam, The Netherlands.

Corresponding author: Christopher J. Rhodes ([crhodes@imperial.ac.uk](mailto:crhodes@imperial.ac.uk))

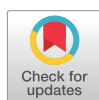

Shareable abstract (@ERSpublications)

***SOX17*, a risk gene in PAH, manifests *in vivo* phenotypes and interacts with key signalling pathways and transcriptional targets in the pathobiology of PAH. Restoration of *SOX17* gene expression and signalling may represent a new therapeutic strategy in PAH.** <https://bit.ly/37ldkIL>

**Cite this article as:** Wu Y, Wharton J, Walters R, *et al.* The pathophysiological role of novel pulmonary arterial hypertension gene *SOX17*. *Eur Respir J* 2021; 58: 2004172 [DOI: 10.1183/13993003.04172-2020].

This single-page version can be shared freely online.

Copyright ©The authors 2021. For reproduction rights and permissions contact [permissions@ersnet.org](mailto:permissions@ersnet.org)

Received: 12 Nov 2020  
Accepted: 8 Feb 2021

## Abstract

Pulmonary arterial hypertension (PAH) is a progressive disease predominantly targeting pre-capillary blood vessels. Adverse structural remodelling and increased pulmonary vascular resistance result in cardiac hypertrophy and ultimately failure of the right ventricle. Recent whole-genome and whole-exome sequencing studies have identified *SOX17* as a novel risk gene in PAH, with a dominant mode of inheritance and incomplete penetrance. Rare deleterious variants in the gene and more common variants in upstream enhancer sites have both been associated with the disease, and a deficiency of *SOX17* expression may predispose to PAH. This review aims to consolidate the evidence linking genetic variants in *SOX17* to PAH, and explores the numerous targets and effects of the transcription factor, focusing on the pulmonary vasculature and the pathobiology of PAH.
